# Supplementary material for: Multichannel Analysis of Surface Waves (MASW) for the internal characterisation of the Flüela rock glacier: overcoming the limitations of seismic refraction tomography
Source: Copernicus journal article supplement (doi:10.5194/tc-20-1163-2026), 2026-02-13
Supplement: Supplementary file 1 [file tc-20-1163-2026-supplement.pdf]

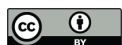

*Supplement of*

**Multichannel Analysis of Surface Waves (MASW) for the internal characterisation of the Flüela rock glacier: overcoming the limitations of seismic refraction tomography**

**Ilaria Barone et al.**

*Correspondence to:* Ilaria Barone (ilaria.barone@unipd.it) and Mirko Pavoni (mirko.pavoni@unipd.it)

The copyright of individual parts of the supplement might differ from the article licence.

### Ray density in Seismic Refraction Tomography (SRT)

Fig. S1 shows the  $V_p$ -model obtained through Seismic Refraction Tomography (SRT) together with the computed ray paths. In the first half of the model domain ( $0 < x < 60$  m, where we assume the absence of the thin water-saturated layer), ray coverage is well distributed at both shallow and intermediate depths. Conversely, in the second half of the section ( $x > 60$  m, where we hypothesize the presence of the saturated layer above the permafrost), the majority of ray paths are concentrated within the near-surface portion of the model, with only a limited number of rays penetrating to deeper levels.

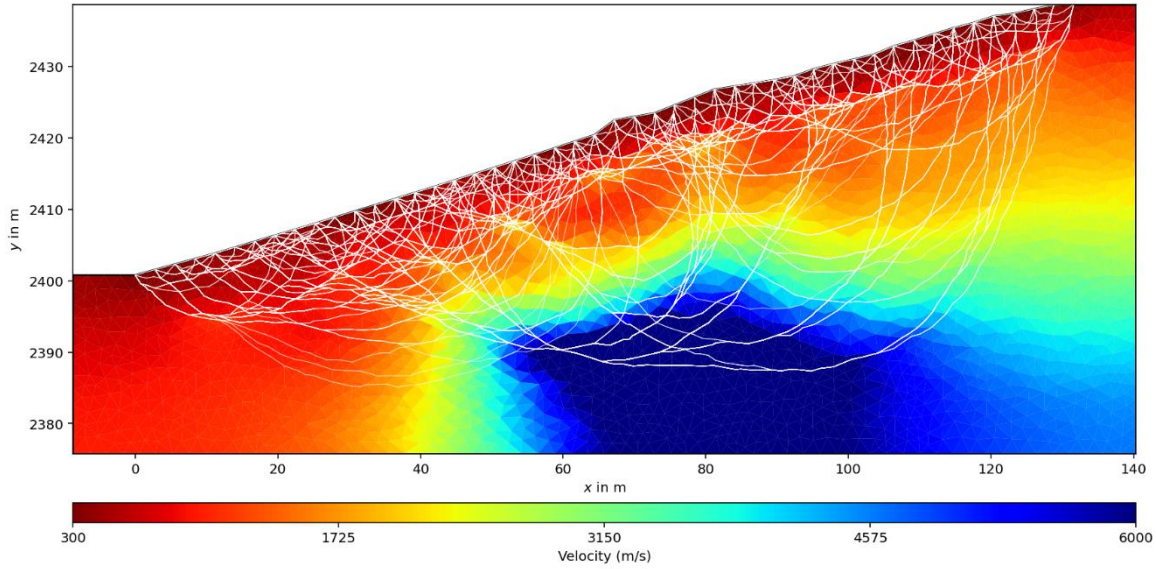

Figure S1:  $V_p$ -model obtained through seismic refraction tomography (SRT), together with the computed ray paths.
